# Supplementary material for: Pickering Emulsions Enhance Oral Bioavailability of Curcumin Nanocrystals: The Effect of Oil Types
Source: MDPI journal article supplement (doi:10.3390/pharmaceutics15051341), 2023-04-26
Supplement: s1 [file s1]

# Pickering emulsions enhance oral bioavailability of curcumin nanocrystals: The effect of oil types

## Supplementary Materials

Yuze Sheng <sup>1,†</sup>, Qin Yu <sup>1,2,†</sup>, Yanping Huang <sup>2</sup>, Quangang Zhu <sup>2</sup>, Zhongjian Chen <sup>2</sup>,  
Wei Wu <sup>1,2,3</sup>, Tao Yi <sup>4</sup> and Yi Lu <sup>1,2,3,\*</sup>

<sup>1</sup> Key Laboratory of Smart Drug Delivery of MOE, School of Pharmacy, Fudan University, Shanghai 201203, China

<sup>2</sup> Shanghai Skin Disease Hospital, Tongji University School of Medicine, Shanghai 200433, China

<sup>3</sup> Fudan Zhangjiang Institute, Shanghai 201203, China

<sup>4</sup> Faculty of Health Sciences and Sports, Macao Polytechnic University, Macau, China

\* Correspondence: fd\_luyi@fudan.edu.cn

† The authors contributed equally to this work.

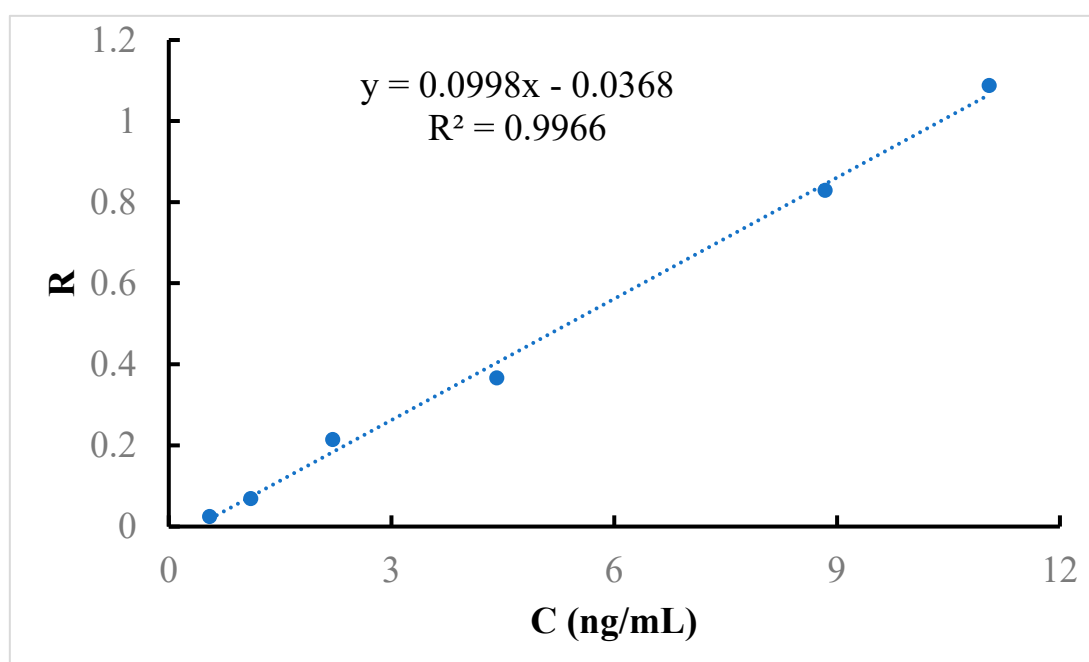

**Figure S1.** The standard curve for detection of CUR in plasma.

**Table S1.** The intra-day and inter-day precision for detection of CUR in plasma.

| Concentration<br>(ng/mL) | Intra-day RSD<br>(%) | Inter-day RSD<br>(%) |
|--------------------------|----------------------|----------------------|
| 1.105                    | 9.089                | 9.471                |
| 4.420                    | 4.190                | 5.533                |
| 8.840                    | 7.569                | 8.414                |

**Table S2.** The accuracy for detection of CUR in plasma.

| Concentration<br>(ng/mL) | Detected concentration<br>(ng/mL) | Accuracy<br>(%) |
|--------------------------|-----------------------------------|-----------------|
| 1.105                    | 1.757 ± 0.099                     | 97.346 ± 8.848  |
| 4.420                    | 4.005 ± 0.168                     | 90.611 ± 3.797  |
| 8.840                    | 7.981 ± 0.603                     | 90.288 ± 6.826  |
